# Supplementary material
Source: ML conference proceedings conference paper supplement (https://openreview.net/forum?id=DGez4B2a6Y)
Supplement: supplementary_material [file attachment]

## A APPENDIX

Our main manuscript presents PIRATE and PIRATE+ as the first PnP based method in DIR. Our experimental results show the effectiveness of the architectures of PIRATE and PIRATE+ and demonstrate their state-of-the-art performance. The additional materials in this section supplement our experimental results and further support the conclusions mentioned above. In appendix, we provide the visualization of warped images and segmentation masks on CANDI dataset as a supplement to the results on OASIS dataset in main manuscript. We also provide additional results on the EMPIRE10 lung CT dataset. In addition to the image similarity and DSC used in main manuscript, we illustrate the warped grids on OASIS and CANDI datasets to further evaluate the performance using the smoothness of registration fields. We design an experiment by using total variation (TV) denoiser (Rudin et al., 1992) in PIRATE to demonstrate the compatibility of PIRATE with non-learning based denoisers. Moreover, we show the visualization of warped images and segmentation masks from PIRATE using dynamic and fixed step size on OASIS dataset, which matches the numerical results in main manuscript. To further evaluate our methods, we include the analysis of computational efficiency and scalability. To clarify the acronyms, we provide a table of acronyms and corresponding full names in this paper. We also provide the corner case of our method and the number of function evaluation(NFE) along with the training iterations of PIRATE+.

Fig. 5 shows the visual results for warped images and correlated warped segmentation masks from PIRATE+ and benchmarks on the CANDI dataset. In the top and bottom row, the results of PIRATE+ in ROI are more consistent with the fixed image with fewer artifacts than other benchmarks.

Table. 4 shows the numerical results of PIRATE, PIRATE+ and benchmarks on the EMPIRE10 lung CT dataset. PIRATE+ shows superior performance compared with other benchmarks. The results of PIRATE show that the pre-trained AWGN denoiser can provide competitive results without refinement of the DEQ.

Fig. 6 and Fig. 7 show the illustration of warped images and correlated warped segmentation masks from PIRATE+ and benchmarks on the EMPIRE10 lung CT dataset. In both warped images and segmentation masks, the results of PIRATE+ are more consistent with the reference than other benchmarks.

Fig. 8 shows the visual results of warped grid from OASIS and CANDI datasets of PIRATE and different baselines. The results show that PIRATE maintains the smoothness of the registration fields.

Fig. 9 shows the visual results of using dynamic step size and fixed step size from OASIS and CANDI datasets. It shows that dynamic step size can provide results more similar to the fixed images and segmentation masks with less artifact.

Fig. 10 shows the visual results of using TV denoiser and DnCNN denoiser from OASIS dataset. Table 5 shows the numerical result of using TV denoiser and DnCNN denoiser from OASIS and CANDI datasets. The results show that TV denoiser can still provide reasonable result, although with some performance degradation.

Table. 6 shows the numerical results of memory cost, running time in training and inference for PIRATE, PIRATE+, and benchmarks on OASIS and CANDI datasets. Table. 6 shows that PIRATE and PIRATE+ has lower memory complexity compared to other DL baselines.

Fig. 11 shows the visual results of memory cost and inference time of PIRATE and PIRATE+ with different size of inputs. Fig. 11 shows that PIRATE and PIRATE+ have similar scalability.

Table. 7 shows acronyms and corresponding full names in this paper.

Fig. 12 shows the visual results of the corner case of PIRATE+ (with the least improvement in Dice) compared with results from other benchmarks on this case. Note that the result of PIRATE+ still maintains state-of-the-art performance in the corner case.

Fig. 13 shows the visual results of NFE along with the training iterations of PIRATE+. The figure shows that the NFE converges in the training process.

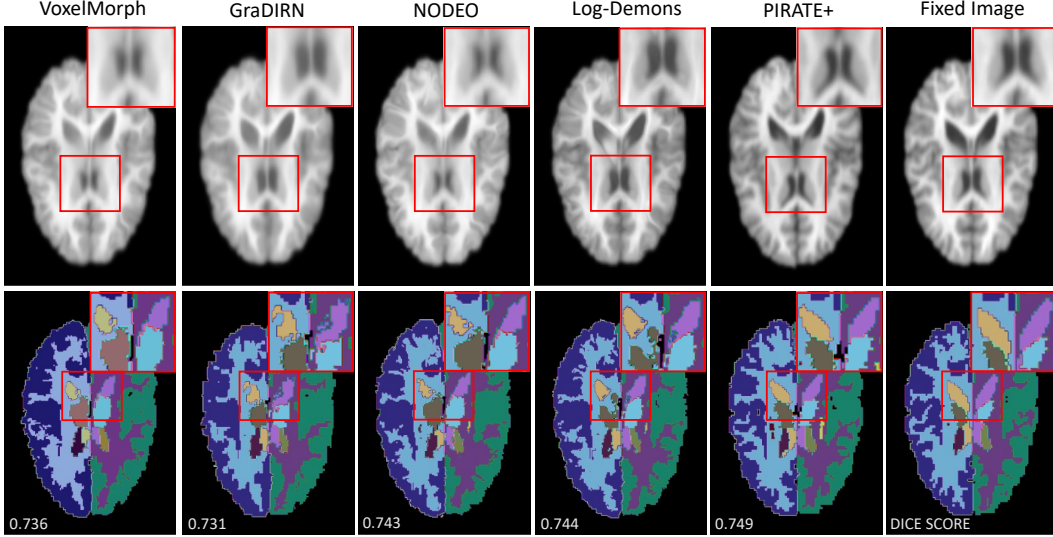

Figure 5: The visual results of warped images (top) and correlated warped segmentation masks (bottom) from PIRATE+ and selected benchmarks on the CANDI dataset. The regions of interest are highlighted within a red box. The DSC for each image is displayed in the bottom row. Note that the result of PIRATE+ is more consistent with the fixed image with fewer artifacts comparing with other baselines.

Table 4: Numerical results of DSC, ratio of negative JD, and inference time for PIRATE, PIRATE+, and benchmarks on the EMPIRE10 lung CT dataset. The variances are shown in parentheses. Note that the **best** and the **second-best** result are highlighted in red and blue. The result shows that PIRATE+ performs state-of-the-art performance comparing with other baselines. Moreover, PIRATE can achieve competitive performance without DEQ

| Method     | Avg. DSC $\uparrow$   | Neg. JD % $\downarrow$ | Time (s)    |
|------------|-----------------------|------------------------|-------------|
| SyN        | 0.9246 (0.045)        | 0.0854 (0.008)         | 37.28       |
| VoxelMorph | 0.9681 (0.022)        | 0.0521 (0.012)         | <b>0.16</b> |
| SYMNet     | 0.9701 (0.012)        | 0.0542 (0.009)         | <b>0.28</b> |
| GraDIRN    | 0.9644 (0.012)        | 0.0542 (0.009)         | 0.44        |
| Log-Demons | 0.9772 (0.019)        | 0.0571 (0.011)         | 43.29       |
| NODEO      | <b>0.9802 (0.028)</b> | <b>0.0441 (0.008)</b>  | 82.17       |
| PIRATE     | 0.9797 (0.032)        | 0.0546 (0.009)         | 29.77       |
| PIRATE+    | <b>0.9811 (0.027)</b> | <b>0.0467 (0.007)</b>  | 45.32       |

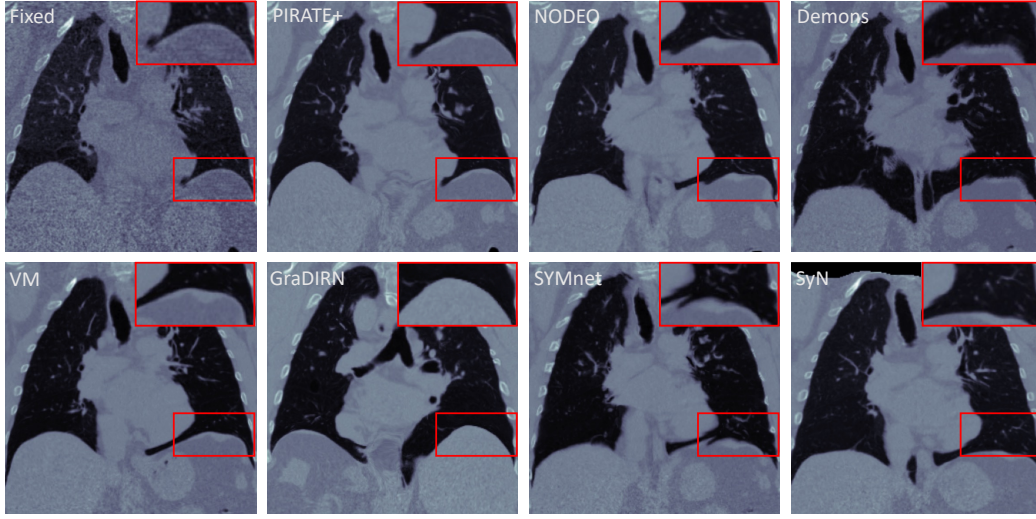

Figure 6: The visual results of warped images from PIRATE+ and selected benchmarks on the EMPIRE10 lung CT dataset. The regions of interest are highlighted within a red box. Note that the result of PIRATE+ is more consistent with the fixed image with fewer artifacts comparing with other baselines.

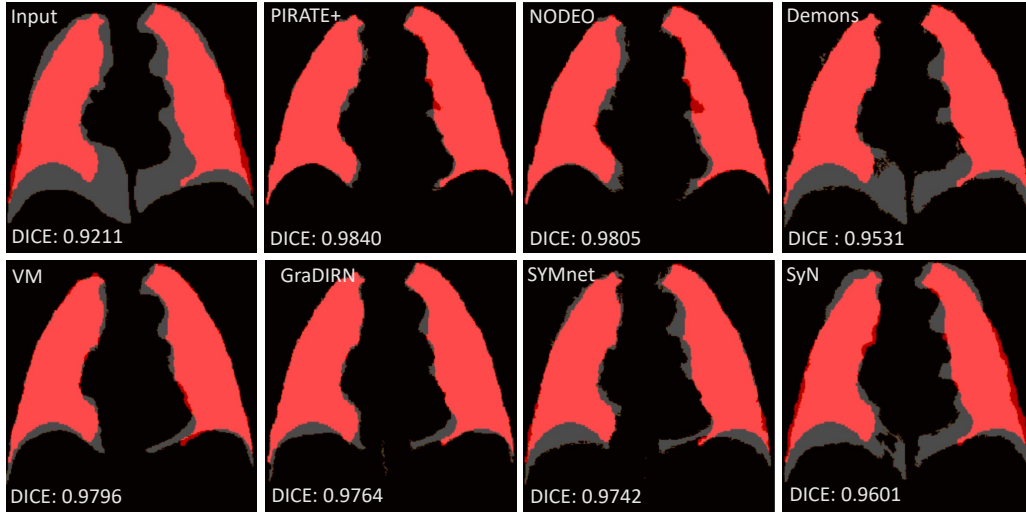

Figure 7: The visual results of warped segmentation masks from PIRATE+ and selected benchmarks on the EMPIRE10 lung CT dataset. The red region is the mask from fixed image, and the gray region is the misalignment of the warped mask. The DSC for each image is displayed in the bottom. Note that the result of PIRATE+ is more consistent with the fixed mask comparing with other baselines.

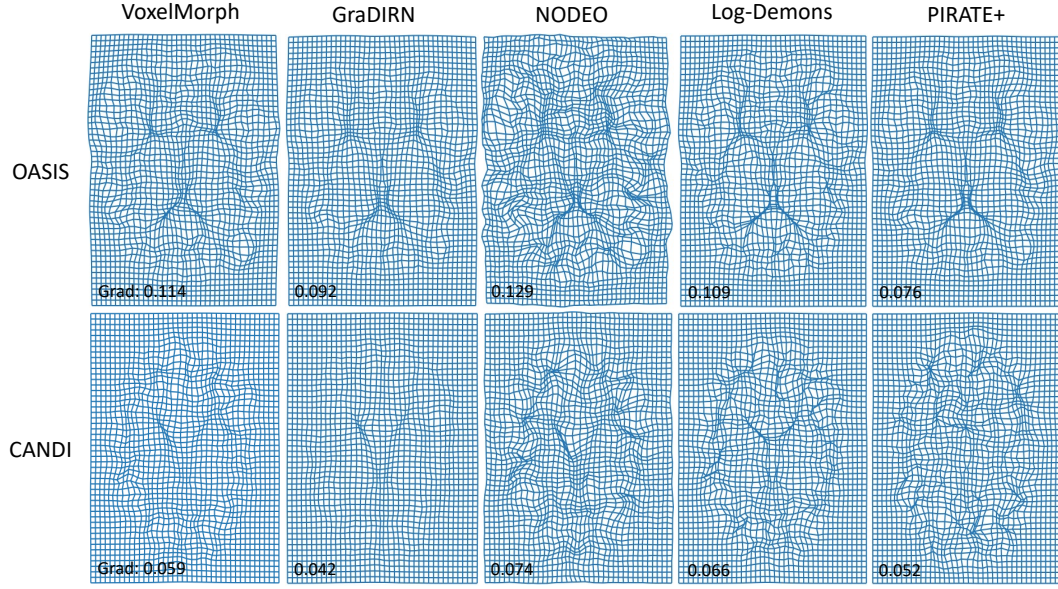

Figure 8: The visual results of warped grid from OASIS (top) and CANDI (bottom) of PIRATE+ and different baselines. The gradient loss is shown at the bottom of each image.

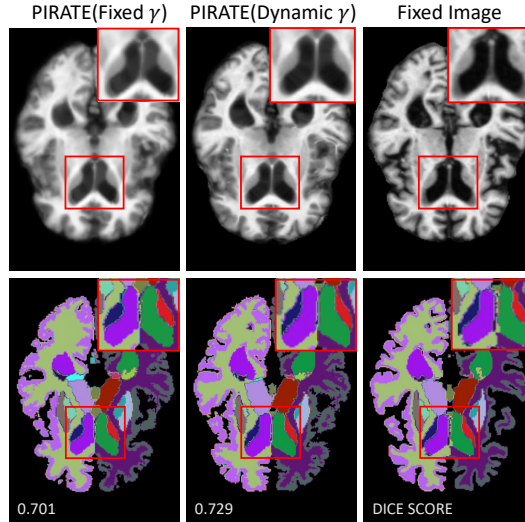

Figure 9: The visual results of warped images (top) and correlated warped segmentation masks (bottom) from PIRATE(fixed  $\gamma$ ) and PIRATE(dynamic  $\gamma$ ) on the OASIS dataset. The regions of interest are highlighted within a red box. The DSC for each image is displayed in the bottom row.



Table 5: Numerical results of DSC, Jacobian determinant, and inference time for PIRATE with total variation (TV) denoiser and DnCNN denoiser on OASIS and CANDI datasets. The variances are shown in parentheses. Note that the **optimal** results are highlighted in red.

| Method        | OASIS                 |                       | CANDI                 |                       | Time (s)     |
|---------------|-----------------------|-----------------------|-----------------------|-----------------------|--------------|
|               | Avg. DSC $\uparrow$   | JD $\downarrow$       | Avg. DSC $\uparrow$   | JD $\downarrow$       |              |
| PIRATE(TV)    | 0.7617 (0.054)        | 0.1281 (0.002)        | 0.7481 (0.049)        | 0.0992 (0.001)        | 118.20       |
| PIRATE(DnCNN) | <b>0.7948 (0.033)</b> | <b>0.0567 (0.002)</b> | <b>0.7624 (0.020)</b> | <b>0.0833 (0.002)</b> | <b>32.01</b> |

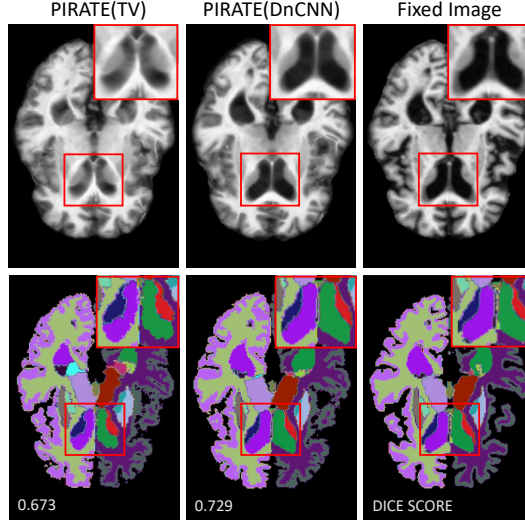

Figure 10: The visual results of warped images (top) and correlated warped segmentation masks (bottom) from PIRATE(TV) and PIRATE(DnCNN) on the OASIS dataset. The regions of interest are highlighted within a red box. The DSC for each image is displayed in the bottom row.

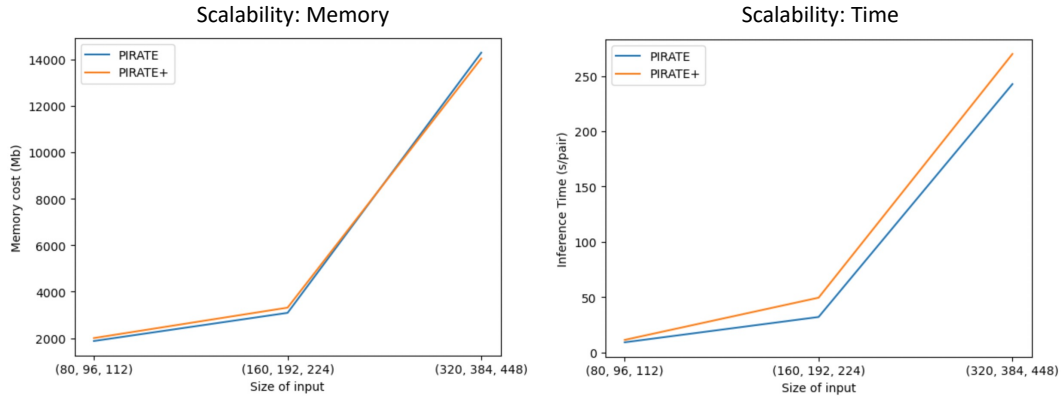

Figure 11: The illustrations of memory cost and inference time of PIRATE and PIRATE+ with different size of inputs. This figure shows that PIRATE and PIRATE+ have similar scalability.

Table 6: Numerical results of memory cost, running time in training and inference for PIRATE, PIRATE+, and benchmarks on OASIS and CANDI datasets. This table shows that PIRATE and PIRATE+ has lower memory complexity compared to other DL baselines.

| Method     | Inference     |                    | Training      |                          |
|------------|---------------|--------------------|---------------|--------------------------|
|            | Memory (MB) ↓ | Running time (s) ↓ | Memory (MB) ↓ | Running time (s/epoch) ↓ |
| SyN        | 2252          | 42.52              | \             | \                        |
| VoxelMorph | 7642          | 0.17               | 12846         | 78                       |
| SYMNet     | 5976          | 0.32               | 16448         | 185                      |
| GraDIRN    | 4386          | 0.49               | 11642         | 112                      |
| Log-Demons | 2709          | 46.72              | \             | \                        |
| NODEO      | 5534          | 89.01              | \             | \                        |
| PIRATE     | 3090          | 32.01              | 5408          | 30.02                    |
| PIRATE+    | 3314          | 49.47              | 8866          | 1821.90                  |

Table 7: Acronyms and corresponding full names in this paper.

| Acronyms | Full name                             | Acronyms | Full name                                    |
|----------|---------------------------------------|----------|----------------------------------------------|
| DIR      | deformable image registration         | DL       | deep learning                                |
| CNN      | convolutional neural network          | PIRATE   | plug-and-play image registration network     |
| DEQ      | deep equilibrium models               | MBDL     | model-based deep learning                    |
| PnP      | plug-and-play                         | NCC      | normalized cross-correlation                 |
| GCC      | global cross-correlation              | DSC      | Dice similarity coefficient                  |
| JD       | Jacobian determinant                  | MSE      | mean squared error                           |
| STN      | spatial transform network             | FCN      | fully convolutional network                  |
| DU       | deep unfolding                        | SD-RED   | steepest descent regularization by denoising |
| AWGN     | additive white Gaussian noise         | NODE     | neural ordinary differential equations       |
| ASM      | adjoint sensitivity method            | MMSE     | minimum mean squared error                   |
| JFB      | Jacobian-Free deep equilibrium models | ROI      | region of interest                           |
| TV       | total variation                       |          |                                              |

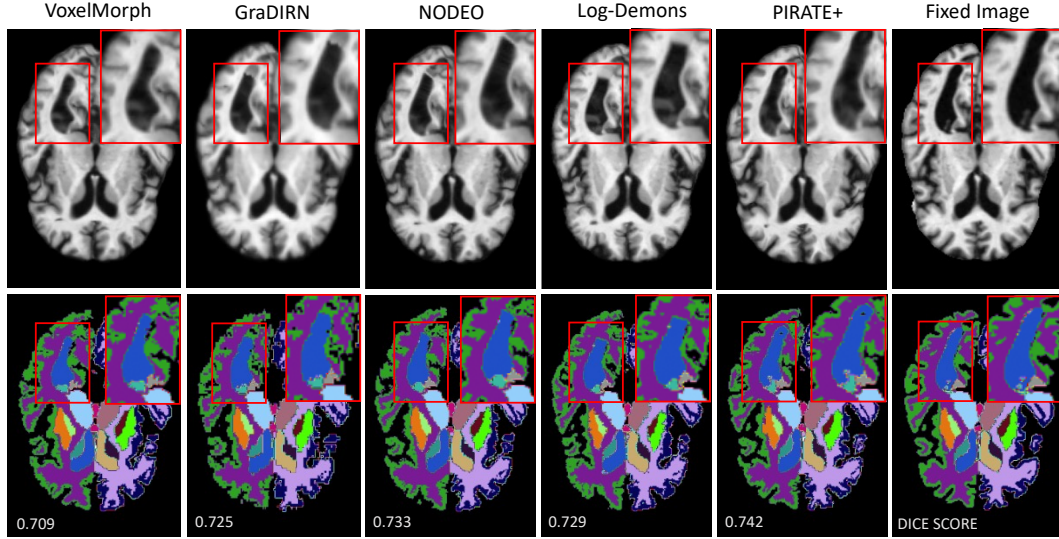

Figure 12: The visual results of warped images (top) and correlated warped segmentation masks (bottom) from the corner case of PIRATE+ (with the least improvement (*not* absolute value) in Dice) compared with results from other benchmarks on this case. The regions of interest are highlighted within a red box. The DSC for each image is displayed in the bottom row. Note that the result of PIRATE+ is still more consistent with the fixed image on this corner case.

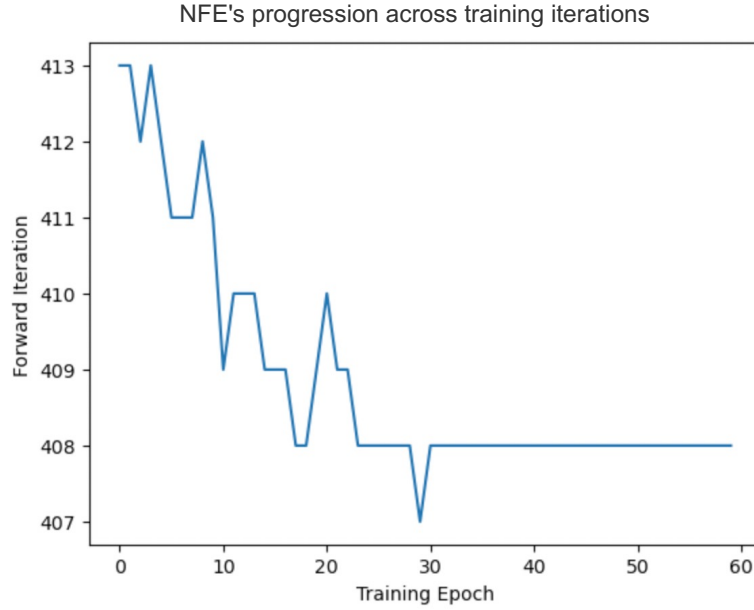

Figure 13: The plot for NFE along with the training iterations of PIRATE+. The results show a convergence behaviour.
